# Supplementary material
Source: PubMed Central journal article supplement (PMC2290763)

**A**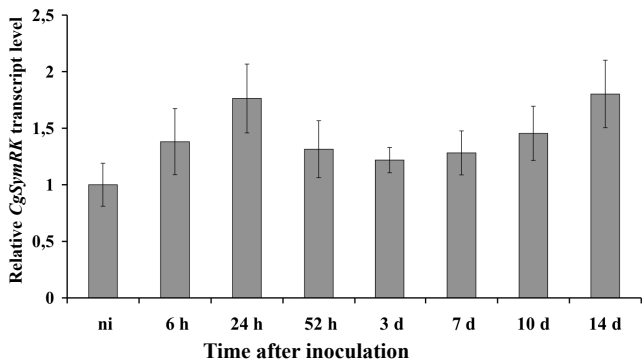**B**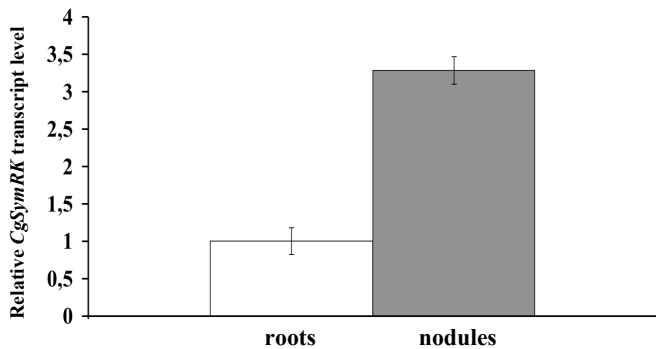

Supplement: pnas_0710618105_1.pdf [file pnas_0710618105_1.pdf]

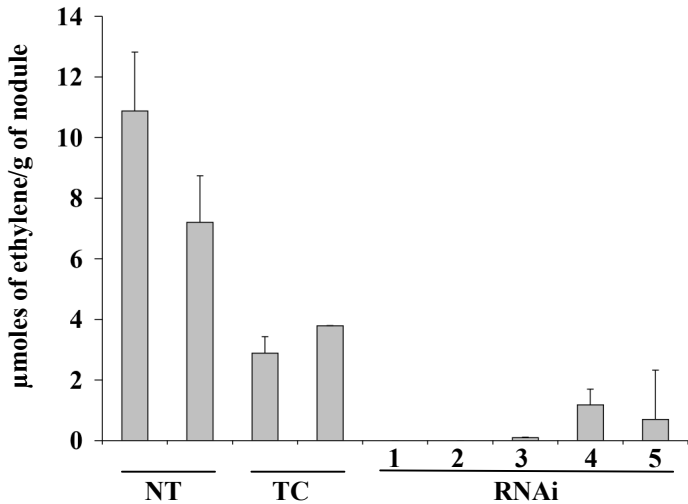

Supplement: pnas_0710618105_2.pdf [file pnas_0710618105_2.pdf]

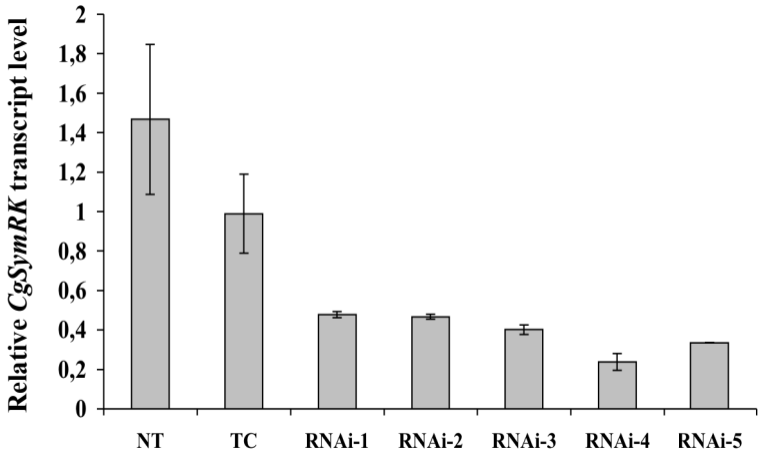

Supplement: pnas_0710618105_3.pdf [file pnas_0710618105_3.pdf]

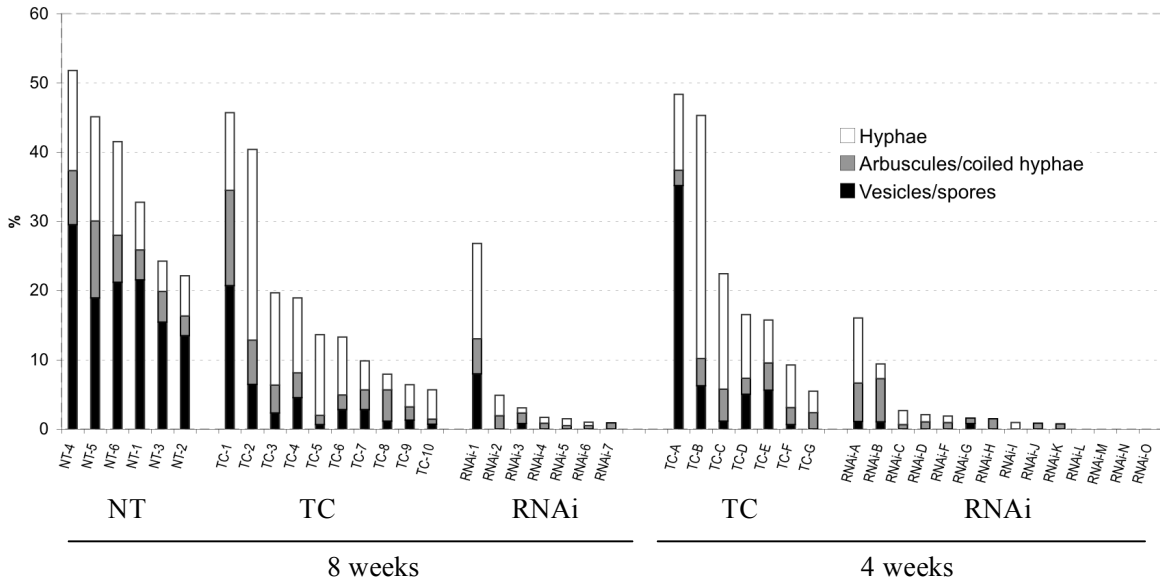

Supplement: pnas_0710618105_4.pdf [file pnas_0710618105_4.pdf]

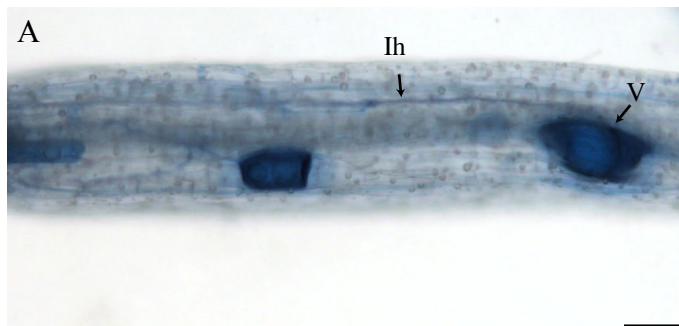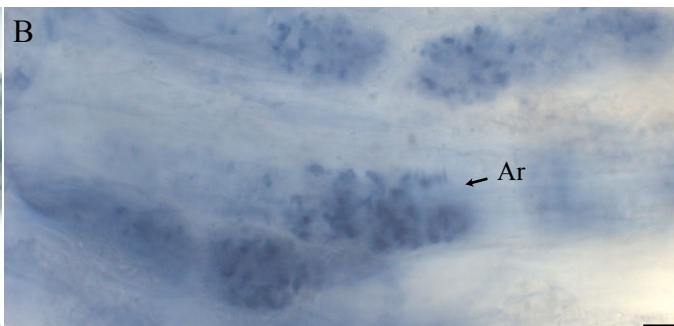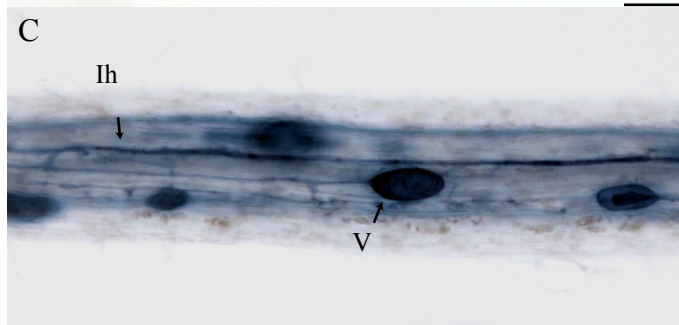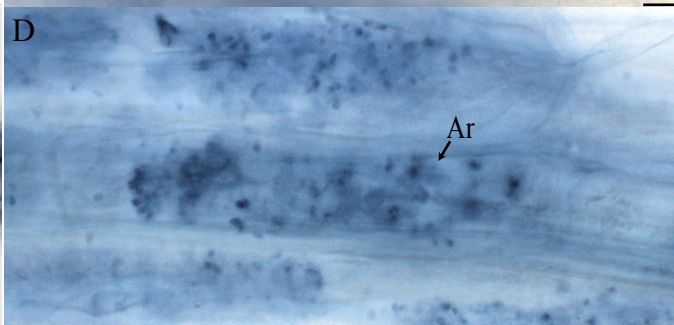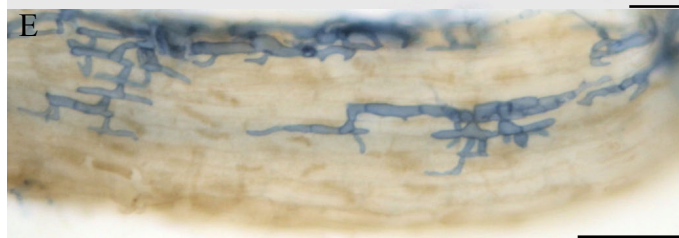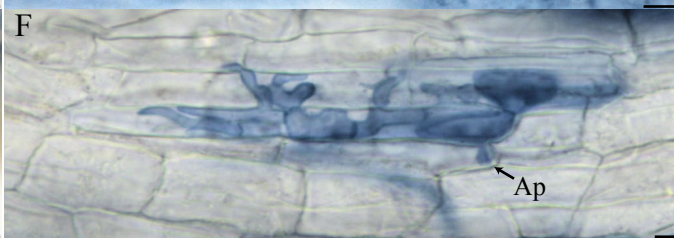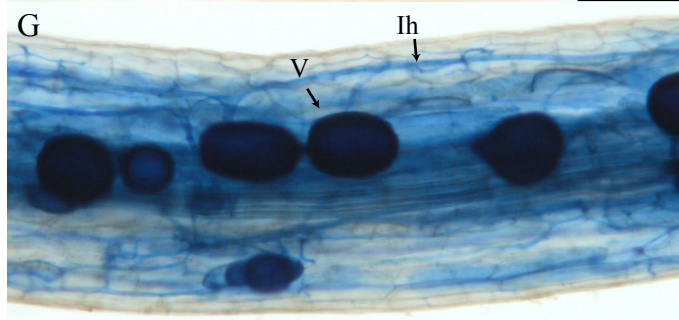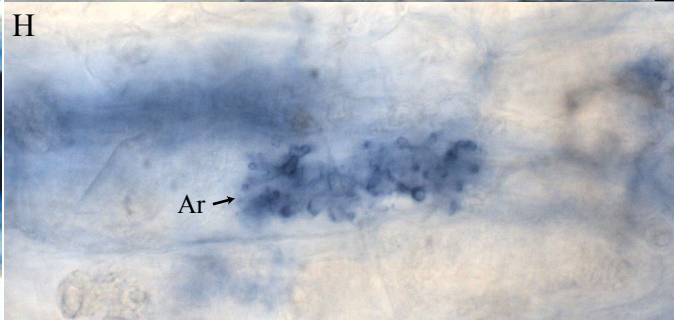

Supplement: pnas_0710618105_5.pdf [file pnas_0710618105_5.pdf]
